# Supplementary material for: Chemically controlled micro-pores and nano-filters for separation tasks in 2D and 3D microfluidic systems
Source: Royal Society of Chemistry journal article supplement (doi:10.1039/c7ra07016k), 2017-01-01
Supplement: c7ra07016k1.pdf [file c7ra07016k1.pdf]

## Supplementary Information

Chemically Controlled Micro-Pores and Nano-Filters for Separation  
Tasks in 2D and 3D Microfluidic Systems

Sebastian Haefner,<sup>a</sup> Philipp Frank,<sup>a,b</sup> Enrico Langer,<sup>a</sup> Denise Gruner,<sup>a</sup>  
Ulrike Schmidt,<sup>c</sup> Martin Elstner,<sup>a</sup> Gerald Gerlach,<sup>c</sup> and Andreas  
Richter<sup>a,c,\*</sup>

<sup>a</sup>Institute of Semiconductors and Microsystems, Department of Electrical and Computer  
Engineering, Technische Universität Dresden, 01069 Dresden, Saxony, Germany

<sup>b</sup>Center for Advancing Electronics Dresden, 01069 Dresden, Saxony, Germany

<sup>c</sup>Institute of Solid State Electronics, Department of Electrical and Computer Engineering,  
Technische Universität Dresden, 01069 Dresden, Saxony, Germany

\*E-mail: andreas.richter7@tu-dresden.de

Supplementary informations demonstrating three videos showing the pore opening procedure for a rectangular pore (aspect ratio  $rect_5$ ) in video S1 and the opening procedure for the cross structured pore (video S2).

In video S3 the filtering of two different sized particles is shown (21°C, 30 % ethanol % (v/v)). The first particle (blue, diameter  $\approx 0.5$  mm) passes the pore structure. The second particle blocks the pore due to its larger size (white particle, diameter  $\approx 1$  mm).
